# Supplementary material for: Engineering PtCu nanoparticles for a highly efficient methanol electro-oxidation reaction
Source: Royal Society of Chemistry journal article supplement (doi:10.1039/d1fd00047k), 2021-08-31
Supplement: d1fd00047k1.pdf [file d1fd00047k1.pdf]

## Supporting Information

### Engineering PtCu Nanoparticles for Highly Efficient Methanol Electro-oxidation

#### Reaction

Pengfei Yao<sup>a,b</sup>, Jing Cao<sup>a,b</sup>, Mingbo Ruan<sup>a</sup>, Ping Song<sup>a</sup>, Xue Gong<sup>a</sup>, Ce Han<sup>a</sup>, Weilin Xu<sup>a,b,\*</sup>

<sup>a</sup>State Key Laboratory of Electroanalytical Chemistry, Jilin Province Key Laboratory of Low Carbon Chemical Power, Changchun Institute of Applied Chemistry, Chinese Academy of Sciences  
5625 Renmin Street, Changchun, Jilin, 130022, P. R. China.

<sup>b</sup>University of Science and Technology of China, Hefei, Anhui, 230026, P. R. China

\*Email: weilinxu@ciac.ac.cn

#### Supporting figures and table

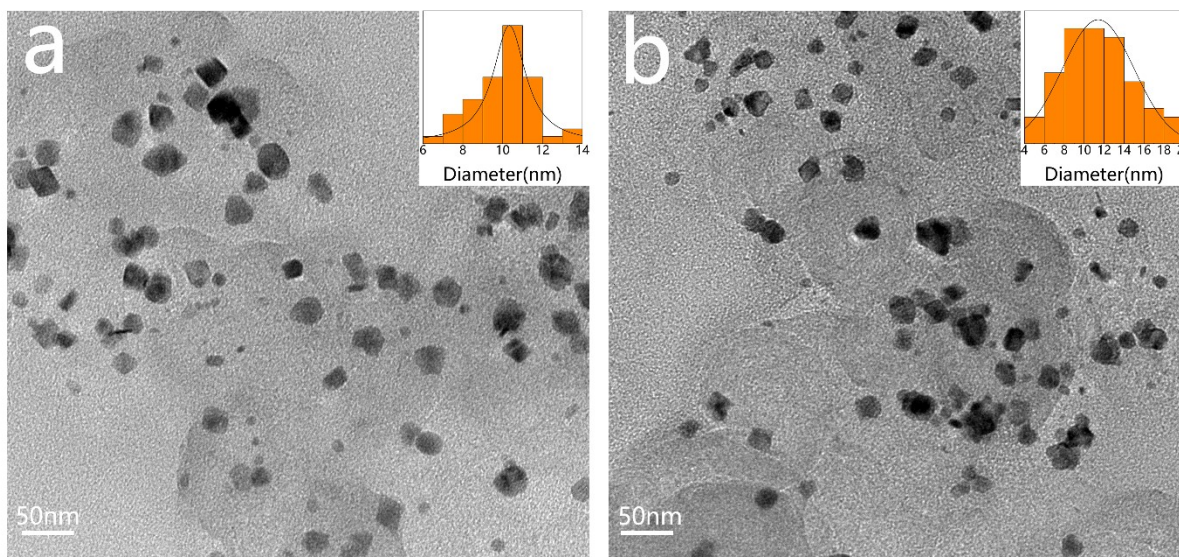

**Figure S1.** TEM image of **a.** PtCu/C and **b.** Pt<sub>3</sub>Cu/C.

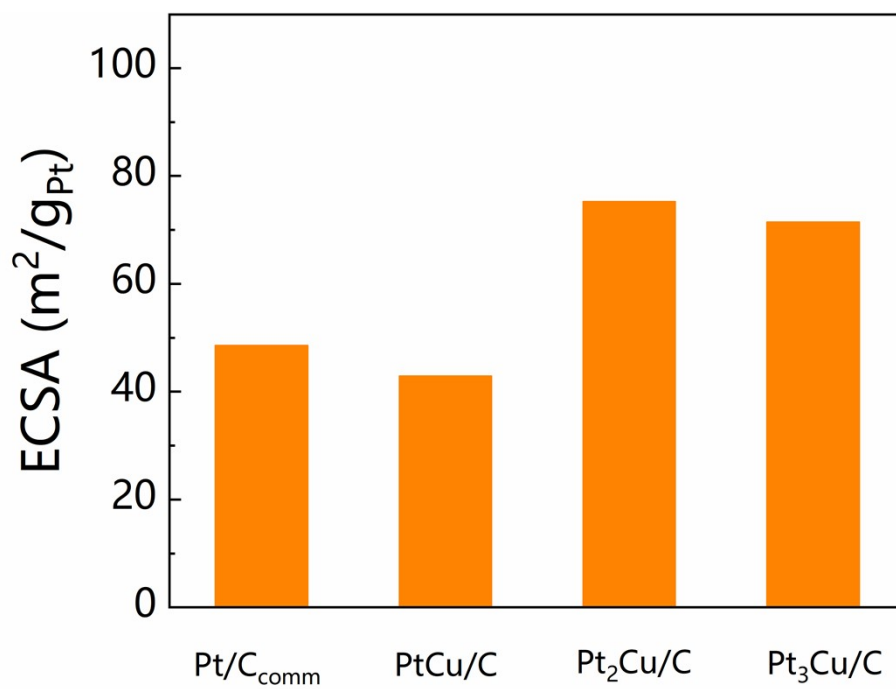

**Figure S2.** The ECSA of different catalysts calculated based on H<sub>UPD</sub> region.

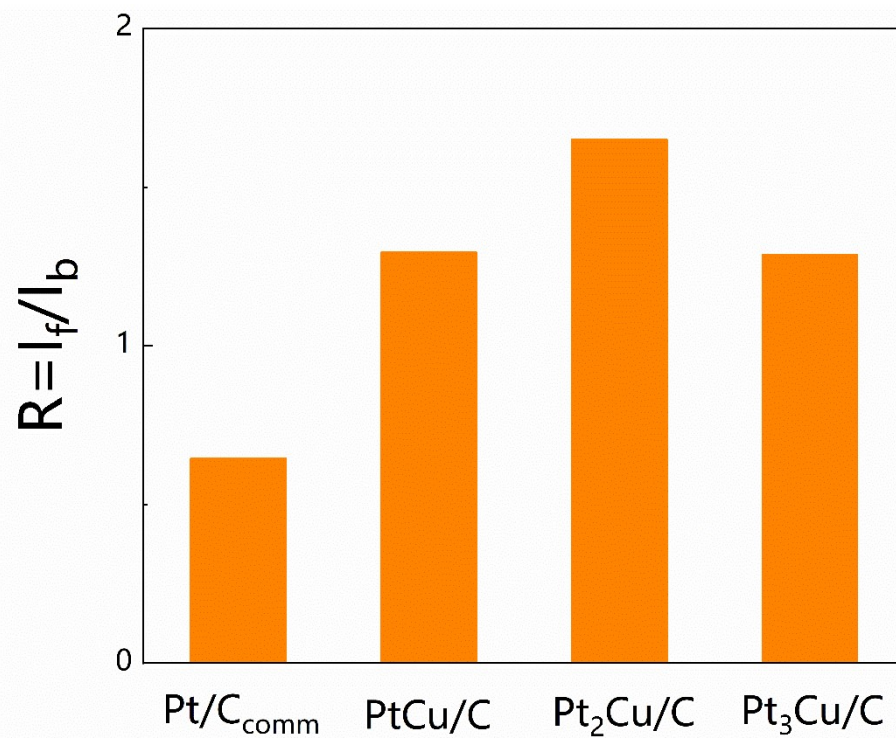

**Figure. S3** I<sub>f</sub>/I<sub>b</sub> values of different catalysts.

**Table S1.** MOR performance of PtCu bimetallic electrocatalysts published in recent year.

| Catalysts                                  | Mass activity (A/mg <sub>Pt</sub> ) | Specific activity (mA/cm <sup>2</sup> ) | Journal/year              |
|--------------------------------------------|-------------------------------------|-----------------------------------------|---------------------------|
| <b>PtCu Alloy</b>                          | 4.1                                 | 5.4                                     | in this work              |
| <b>Porous Pt-Cu<sup>1</sup></b>            | 0.3                                 | 1.7                                     | Chem.-Eur. J. 2021        |
| <b>PtCu nanodendrite<sup>2</sup></b>       | 3.1                                 | 2.7                                     | Chem. Comm. 2020          |
| <b>Hollow PtCu nanoring<sup>3</sup></b>    | 2.2                                 | 5.2                                     | J. Mater. Chem. A 2020    |
| <b>PtCu octahedral<sup>4</sup></b>         | 0.5                                 | 2.5                                     | Catal. Sci. Technol. 2020 |
| <b>PtCu alloy nanoclusters<sup>5</sup></b> | 1.3                                 | 1.8                                     | Electrochim. Acta, 2019   |
| <b>PtCu octahedral<sup>6</sup></b>         | 1.4                                 | 4.1                                     | Nanoscale, 2018           |
| <b>PtCu nanotube<sup>7</sup></b>           | 2.3                                 | 6.1                                     | Energy Environ. Sci.,2017 |
| <b>PtCu Nanoframe<sup>8</sup></b>          | 0.2                                 | 1.7                                     | Adv. Mater.,2016          |

## Reference

- 1 Wang, Y.; Yu, H. Z.; Ying, J.; Tian, G.; Liu, Y.; Geng, W.; Hu, J.; Lu, Y.; Chang, G. G.; Ozoemena, K. I.; Janiak, C.; Yang, X. Y., *Chem-Eur J* 2021, **27**, 9124-9128.
- 2 Song, T.; Xue, H.; Guo, N.; Sun, J.; Qin, L.; Guo, L.; Huang, K.; He, F.; Wang, Q., *Chem. Commun.* 2020, **56**, 7136-7139.
- 3 Shi, Y.; Fang, Y.; Zhang, G.; Wang, X.; Cui, P.; Wang, Q.; Wang, Y., *J. Mater. Chem. A* 2020, **8**, 3795-3802.
- 4 Polani, S.; Shviro, M.; Shokhen, V.; Zysler, M.; Gluesen, A.; Dunin-Borkowski, R.; Carmo, M.; Zitoun, D., *Catal Sci Technol* 2020, **10**, 5501-5512.
- 5 Zhong, J. P.; Li, L. L.; Waqas, M.; Wang, X. Q.; Fan, Y. J.; Qi, J. H.; Yang, B.; Rong, C. Y.; Chen, W.; Sun, S. G., *Electrochim. Acta* 2019, **322**, 134677-134685.
- 6 Li, C.; Liu, T.; He, T.; Ni, B.; Yuan, Q.; Wang, X., *Nanoscale* 2018, **10**, 4670-4674.
- 7 Li, H. H.; Fu, Q. Q.; Xu, L.; Ma, S. Y.; Zheng, Y. R.; Liu, X. J.; Yu, S. H., *Energy Environ. Sci.* 2017, **10**, 1751-1756.
- 8 Zhang, Z. C.; Luo, Z. M.; Chen, B.; Wei, C.; Zhao, L.; Chen, J. Z.; Zhang, X.; Lai, Z. C.; Fan, Z. X.; Tan, C. L.; Zhao, M. T.; Lu, Q. P.; Li, B.; Zong, Y.; Yan, C. C.; Wang, G. X.; Xu, Z. J. C.; Zhang, H., *Adv. Mater.* 2016, **28**, 8712-8717.
